# Supplementary material
Source: publisher figshare collection journal article supplement (https://sage.figshare.com/ndownloader/files/14464496)
Supplement: Supplementary file 1 [file 14464496]

Supplemental Table 1. List of analytes

| **PCBs: Individual and Co-Eluting Congeners** | | | | | | |
| --- | --- | --- | --- | --- | --- | --- |
| 1 | 26 | 52/73 | 83/108 | 110 | 137 | 162 |
| 2 | 28 | 53 | 84 | 111/117 | 138/163/164 | 165 |
| 3 | 29 | 54 | 85/120 | 112 | 149/139 | 166 |
| 4/10 | 30 | 55 | 97/86 | 113 | 140 | 167 |
| 8/5 | 31 | 56/60 | 87/115/116 | 114 | 141 | 169 |
| 6 | 35 | 57 | 88/121 | 119 | 145 | 170/190 |
| 7/9 | 36 | 58 | 90/101/89 | 122 | 146 | 171 |
| 11 | 37 | 74/61 | 91 | 123 1 | 147 | 172/192 |
| 12/13 | 38 | 65/62 | 92 | 124 | 148 | 173 |
| 14 | 39 | 63 | 95/93 | 125 | 150 | 174/181 |
| 15 | 40 | 66/80 | 94 | 126 | 151 | 175 |
| 16/32 | 41/71/64/68 | 67 | 96 | 128 | 152 | 176 |
| 17 | 42/59 | 69 | 98/102 | 129 | 153 | 177 |
| 18 | 49/43 | 70/76 | 99 | 130 | 154 | 178 |
| 19 | 44 | 72 | 100 | 131/142 | 155 | 179 |
| 33/20/21 | 45 | 77 | 103 | 132/168 | 156 | 180 |
| 22 | 46 | 78 | 104 | 133 | 157 | 187/182 |
| 34/23 | 47/48/75 | 79 | 105/127 | 134/143 | 158/160 | 183 |
| 24/27 | 50 | 81 | 118/106 | 144/135 | 159 | 184 |
| 25 | 51 | 82 | 107/109 | 136 | 161 | 185 |
| 186 | 191 | 195 | 198 | 201 | 205 | 208 |
| 188 | 193 | 196/203 | 199 | 202 | 206 | 209 |
| 189 | 194 | 197 | 200 | 204 | 207 |  |
| **Organochlorine Pesticides** | | | | | | |
| *E1 Pesticides* | | | | *E2 Pesticides* | | |
| Hexachlorobenzene | | Nonachlor, cis- | | HCH, delta | | |
| HCH, alpha | | 2,4'-DDD | | Heptachlor Epoxide | | |
| HCH, beta | | 4,4'-DDD | | alpha-Endosulphan | | |
| HCH, gamma | | 2,4'-DDE | | Dieldrin | | |
| Heptachlor | | 4,4'-DDE | | Endrin | | |
| Aldrin | | 2,4'-DDT | | beta-Endosulphan | | |
| Chlordane, oxy- | | 4,4'-DDT | | Endosulphan Sulphate | | |
| Chlordane, gamma (trans) | | Mirex | | Endrin Aldehyde | | |
| Chlordane, alpha (cis) | | Technical Toxaphene | | Endrin Ketone | | |
| Nonachlor, trans- | |  | | Methoxychlor | | |
| **Polynuclear Aromatic Hydrocarbons** | | | | | | |
| *Standard PAH Parents and Select Alkylated PAHs determined by linearity* | | *Alkylated PAHs determined by linearity* | | *Extended alkylated PAHs determined by linearity* | | |
| Acenaphthene | | 1-Methylnaphthalene | | C1-Biphenyls | | |
| Acenaphthylene | | C1-Naphthalenes | | C2-Biphenyls | | |
| Anthracene | | 1,2-Dimethylnaphthalene | | C1-Acenaphthenes | | |
| Benz(a)anthracene | | C2-Naphthalenes | | 2-Methylfluorene | | |
| Benzo(b)fluoranthene | | 2,3,6-Trimethylnaphthalene | | C1-Fluorenes | | |
| Benzo(j/k)fluoranthenes | | C3-Naphthalenes | | 1,7-Dimethylfluorene | | |
| Benzo(a)pyrene | | 1,4,6,7-Tetramethylnaphthalene | | C2-Fluorenes | | |
| Benzo(e)pyrene | | C4-Naphthalenes | | C3-Fluorenes | | |
| Benzofluoranthenes | | 2-Methylphenanthrene | | 2/3-Methyldibenzothiophenes | | |
| Benzo(ghi)perylene | | 3-Methylphenanthrene | | C1-Dibenzothiophene | | |
| Chrysene | | 9/4-Methylphenanthrenes | | 2,4-Dimethyldibenzothiophene | | |
| Dibenzo(ah)anthracene | | 2-Methylanthracene | | C2-Dibenzothiophene | | |
| Dibenzothiophene | | C1-Phenanthrenes /Anthracenes | | C3-Dibenzothiophene | | |
| 2,6-Dimethylnaphthalene | | 1,7-Dimethylphenanthrene | | C4-Dibenzothiophene | | |
| Fluoranthene | | 1,8-Dimethylphenanthrene | | 3-Methylfluoranthene/  Benzo(a)fluorene | | |
| Fluorene | | 2,6-Dimethylphenanthrene | | C1-Fluoranthenes/Pyrenes | | |
| Indeno(1,2,3-cd)pyrene | | 3,6-Dimethylphenanthrene | | C2-Fluoranthenes/Pyrenes | | |
| 2-Methylnaphthalene 1 | | C2-Phenanthrenes /Anthracenes | | C3-Fluoranthenes/Pyrenes | | |
| 1-Methylphenanthrene | | 1,2,6-Trimethylphenanthrene | | C4-Fluoranthenes/Pyrenes | | |
| Naphthalene | | C3-Phenanthrenes /Anthracenes | | 1-Methylchrysene | | |
| Perylene | | Retene | | 5/6-Methylchrysenes | | |
| Phenanthrene | | C4-Phenanthrenes /Anthracenes | | C1-Benz(a)anthracenes/Chrysenes | | |
| Pyrene | | Biphenyl | | 5,9-Dimethylchrysene | | |
| 2,3,5-Trimethylnaphthalene | |  | | C2-Benz(a)anthracenes/Chrysenes | | |
|  | |  | | C3-Benz(a)anthracenes/Chrysenes | | |
|  | |  | | C4-Benz(a)anthracenes/Chrysenes | | |
|  | |  | | 7-Methylbenzo(a)pyrene | | |
|  | |  | | C1-Benzofluoranthenes/  Benzopyrenes | | |
|  | |  | | C2-Benzofluoranthenes/  Benzopyrenes | | |
